# Supplementary material
Source: PubMed Central journal article supplement (PMC9664375)
Supplement: NIHMS1834333-supplement-MMC1.pdf [file NIHMS1834333-supplement-MMC1.pdf]

**Cell Metabolism, Volume 34**

**Supplemental information**

**3D chromatin maps of the human pancreas**

**reveal lineage-specific regulatory**

**architecture of T2D risk**

**Chun Su, Long Gao, Catherine L. May, James A. Pippin, Keith Boehm, Michelle Lee, Chengyang Liu, Matthew C. Pahl, Maria L. Golson, Ali Naji, HPAP Consortium, Struan F.A. Grant, Andrew D. Wells, and Klaus H. Kaestner**

## Supplemental Figure Legends

Supplemental Figure 1. Pancreatic islet cell transcriptomic profile defined using scRNA-seq. A, Clustering of gene expression profile from 5,288 pancreatic cells from organ donors without diabetes identified 9 distinct clusters on UMAP. Endo: endothelial; eps: epsilon (ghrelin producing); mes: mesenchymal; PP: (pancreatic polypeptide producing). B, the expression of marker genes in single cells and donor composition within cell type clusters. C, Pearson correlation of gene expression between donors. D, Pearson correlation of gene expression between cell types. E, Estimate of cell composition in sorted pancreatic cell subsets through integration of scRNA-seq. The cell type composition from bulk RNA-seq data on sorted pancreatic cell subsets were characterized using a list of gene markers obtained from panel B.

Supplemental Figure 2. Pancreatic islet cell chromatin accessibility profile defined using scATAC-seq. A, Clustering of accessible chromatin profile from 12,473 pancreatic cells from organ donors without diabetes identified 9 distinct clusters on UMAP. B, Promoter accessibility of selected marker genes in single cells and donor composition within cell type clusters. Promoters were defined as the window of -1,500 to +500bp around TSS in Gencode V19 annotation. C, scATAC-seq and bulk ATAC-seq accessibility signal around selected marker genes: CPA1 (acinar), GCG (alpha) and IGF2 (beta). Fragments were aggregated for each cell type in scATAC-seq. The coverage for both scATAC-seq and bulk ATAC-seq was normalized using the RPGC method from deeptools. D, Pearson correlation of OCR accessibility between scATAC-seq and bulk ATAC-seq. OCR accessibility were calculated as FPKM by mapping either cell type aggregated fragments from scATAC-seq or fragments of bulk ATAC-seq to the consensus pseudo-bulk peak reference. E, Spearman correlation between t-statistics of cluster-specific genes based on promoter accessibility (scATAC-seq) and gene expression (scRNA-seq).

Supplemental Figure 3. 3D chromatin architecture of pancreatic cell subsets defined by Hi-C assay. A, Stratum-adjusted correlation coefficient (SCC) between Hi-C samples to measure sample reproducibility and interrelationships of cell lineages. B, the number of Topologically Associating Domains (TADs) identified in each cell type. C, the distribution of TAD size in each cell type. D, Aggregate peak analysis (APA) plots of chromatin loops identified by the loop callers Mustache and Fit-Hi-C2. The APA scores were calculated with respect to the enrichment of the center pixel at 4kb resolution and labelled at the top left corner. E, Venn diagram of consensus loop calls across cell types. The consensus loops were collected by merging loop calls from 1kb, 2kb and 4kb resolutions with preference to keep the highest resolution data. F, The number of loops annotated to open chromatin regions (OCR) and genes. OCR (green): both anchors overlapped OCRs; Gene (teal): both anchors overlapped gene promoters (-1,500 to +500bp around the TSS). Gene-OCR (purple): one anchor overlapped an OCR and the other anchor overlapped a gene promoter. G, Z-score distribution of co-accessible promoters and distal OCRs detected by Hi-C chromatin loops. P-values were calculated by two-sided Wilcoxon rank sum test. H, The number of loop anchors overlapped with chromHMM chromatin features. chromHMM chromatin states for acinar and endocrine cells were previously defined in Arda et al. 2018. I, Enrichment of chromatin loops at open chromatin regions and regulatory chromatin

features defined by chromHMM. The enrichment fold change was obtained by comparing called loops to distance-matched random chromatin contacts. The p-value was calculated by a 100-fold permutation test.

Supplemental Figure 4. Illustration of variant-to-gene mapping. The candidate variants were first defined by proxy SNPs within high LD ( $R^2 > 0.8$ ) with sentinel signals from GWAS, and then filtered to proxy SNPs located in open chromatin by peaks called from ATAC-seq. The open proxy SNPs were mapped to candidate genes with two approaches. (1) Distal genes were linked to open SNP-containing peaks with physical interaction evidence from Hi-C loop calls for each cell type (left diagram). (2) Proximal genes whose promoter regions (-1,500bp ~ +500bp of TSS) fall within open SNP-containing peaks.

Supplemental Figure 5. Cell type specific implicated genes and examples of likely disruption of transcription factor DNA binding motifs by T2D relevant SNPs. A. Comparison of genes implicated by our approach and that of Rai and colleagues (Rai et al., 2020). Yellow indicates sets of GWAS sentinel:gene pairs specific to this study, cyan indicates genes specific to Rai et al., 2020, and magenta indicates groups implicated in both studies. Sentinel:gene pairs specific to beta cells are highlighted (black: closest gene to sentinel, red not the closest gene). B. Genomic track for KCNQ1 a putative acinar cell specific effector gene. C. Variants at the TH/INS/TRPM5 locus that are in contact loops with the INS or TRPM5 promoter likely disrupt binding of the TFs indicated. D. Disruption of a putative NEUROD2 binding site by rs4234731 in the WSF1 gene. E. Genomic track for DGKB a putative beta cell specific effector gene.

Supplemental Figure 6. Comparison of T2D variant-to-gene mapping with other diabetes relevant traits. A, 'Upset' plot of putative casual-variant-gene pairs across diabetes-related traits. Examined traits include type 2 diabetes (T2D), fasting glucose (FG), Hemoglobin A1C (HbA1c), fasting insulin (FI), 2h glucose (2hGlu) and T1D. Each row corresponds to the set of putative casual-variant to gene pairs in each trait. Each column corresponds to one segment of a Venn diagram obtained by intersecting the traits indicated as black circles. All segments that intersect with T2D are highlighted in red. The number of putative casual-variant to gene pairs in each set and intersecting segment are summarized in the bar graph on top. B, Stacked association plots of T2D with FG and HbA1c at T2D sentinel signal rs10228066. Variant-to-gene mapping implicates rs10228796 as the candidate causal variant and the linked rs10228796 to the candidate effector gene DGKB with beta cell-specific chromatin loops (Supplemental Figure 9C, Supplemental Table 10). C, HyPrColoc identified rs10228796 as a candidate causal variant explaining the shared association signal among T2D, FG and HbA1c. The posterior probability of colocalization between the traits was 0.819 and rs10228796 explained 33.6% of their colocalization.

Supplemental Figure 1. Single Cell RNAseq Analysis. Related to Figure 1.

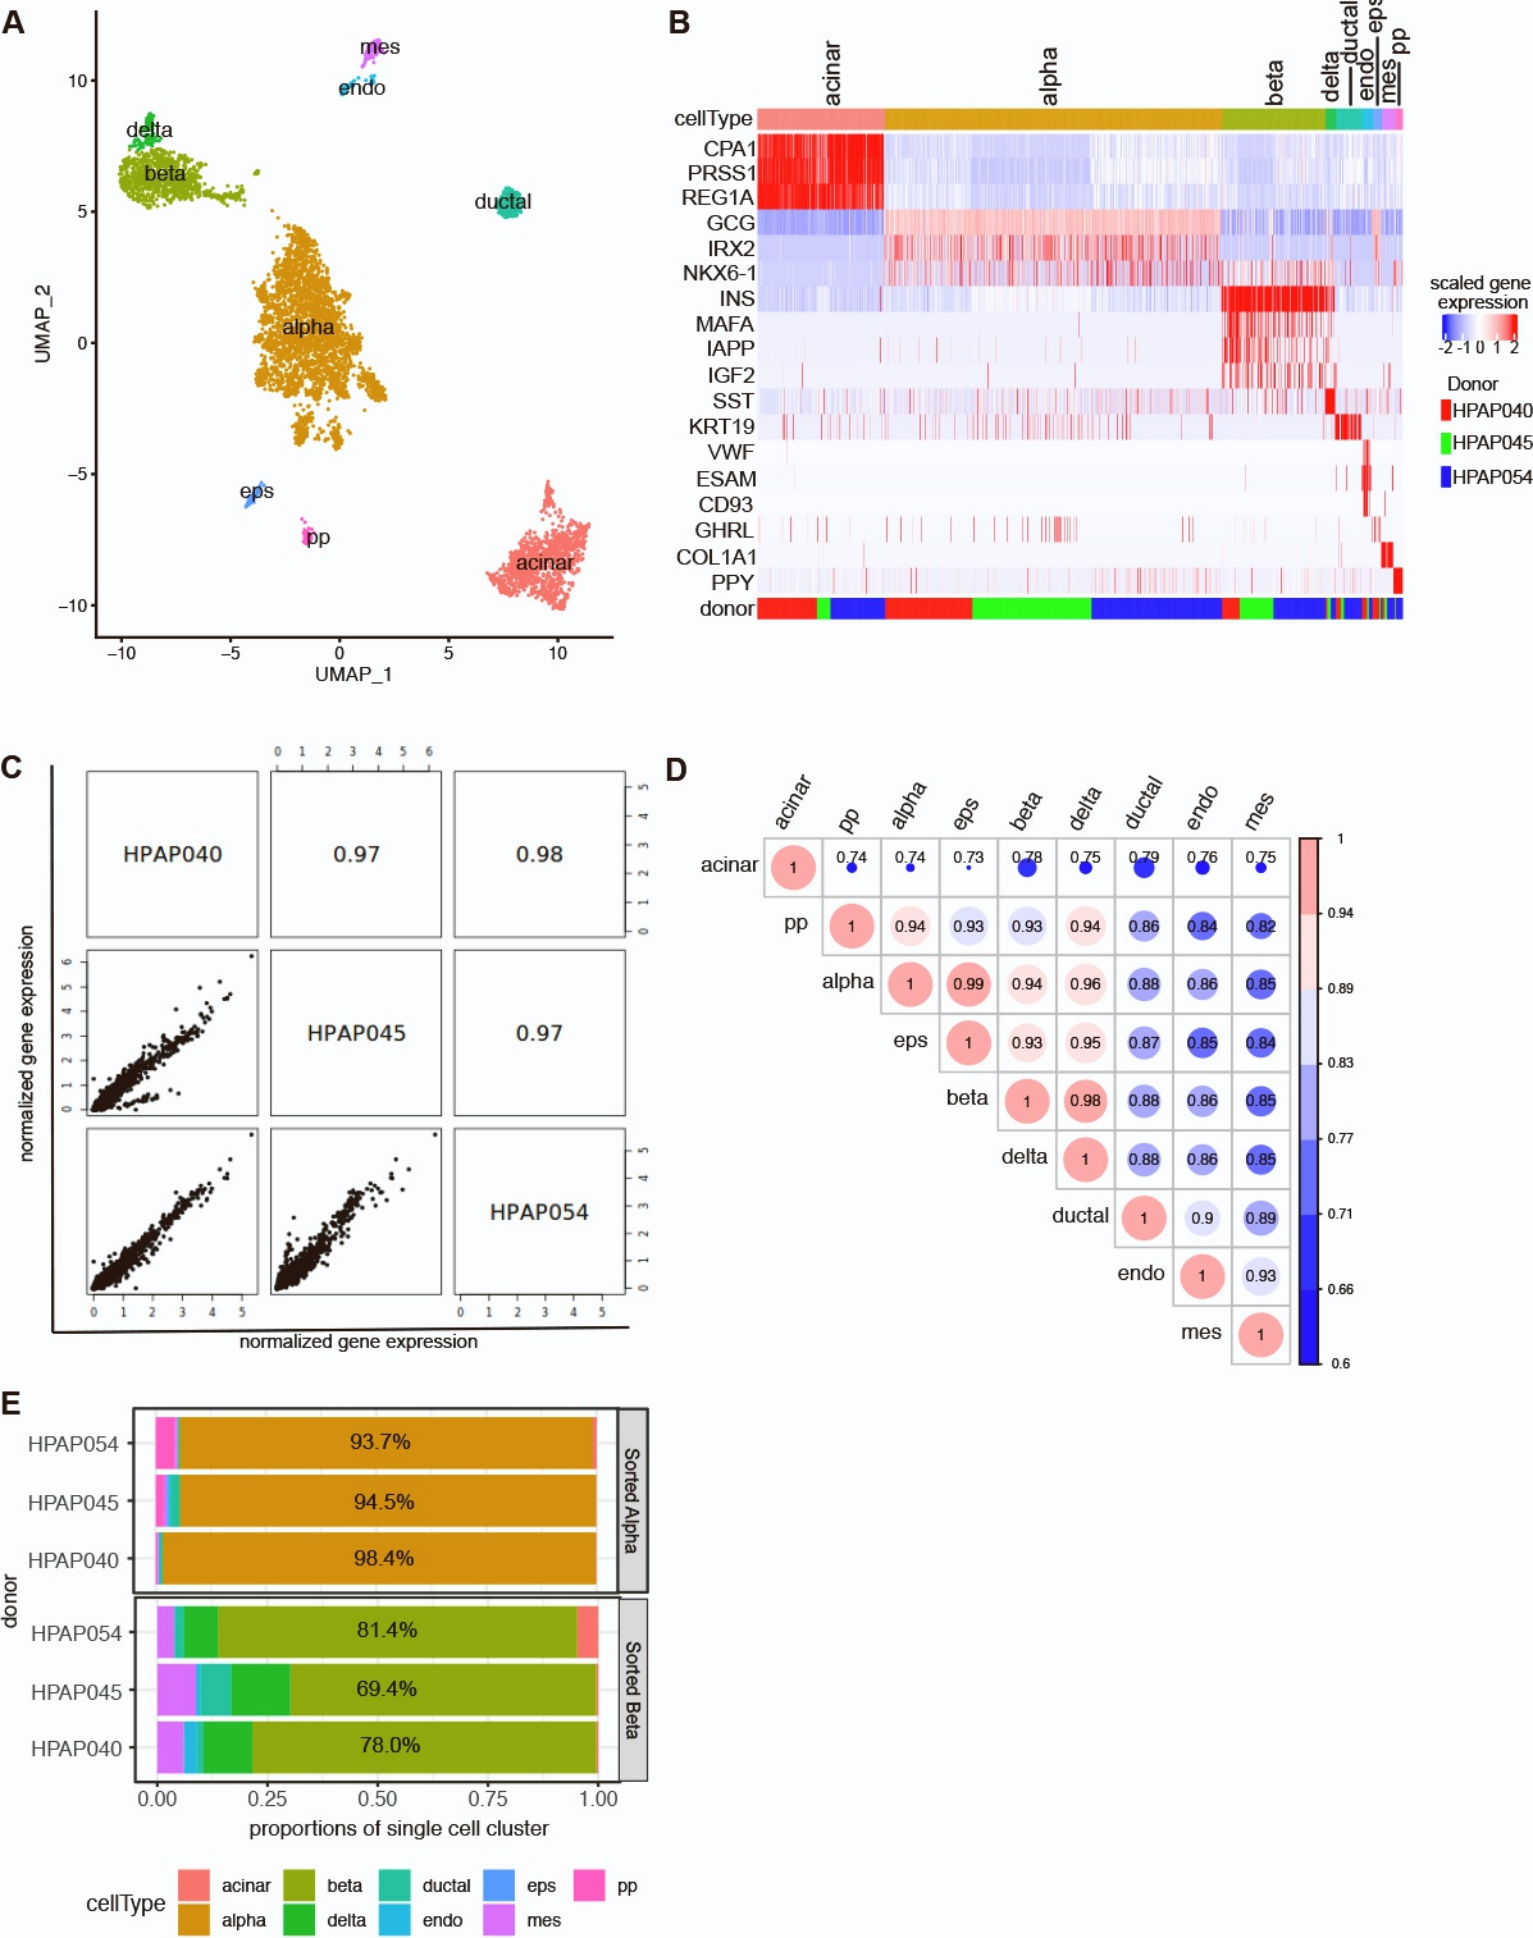





# Supplemental Figure 3. Chromatin Loop Analysis. Related to Figure 3.

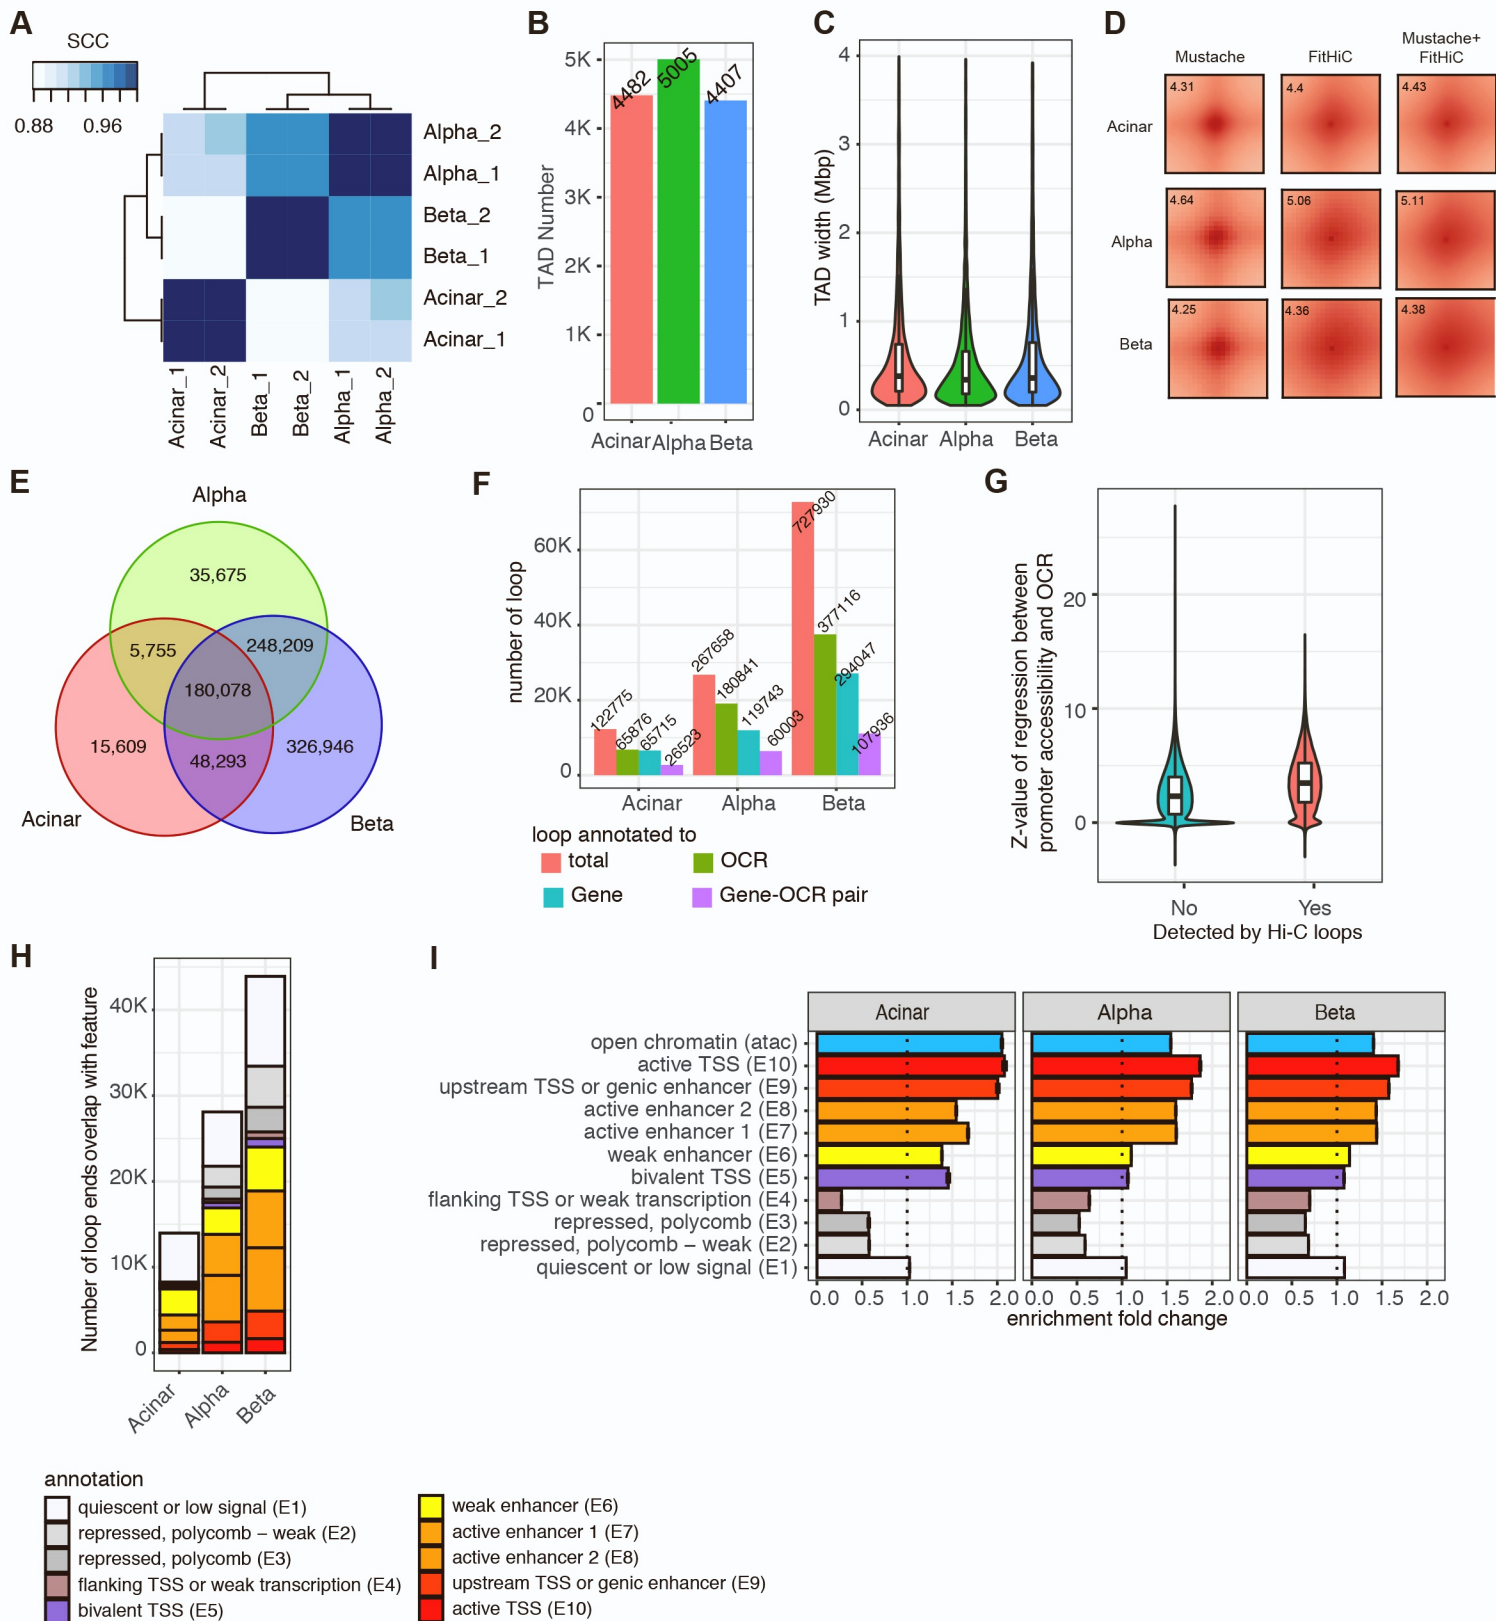

Supplemental Figure 4. Variant to Gene Mapping. Related to Figures 5 and 6.

**A**

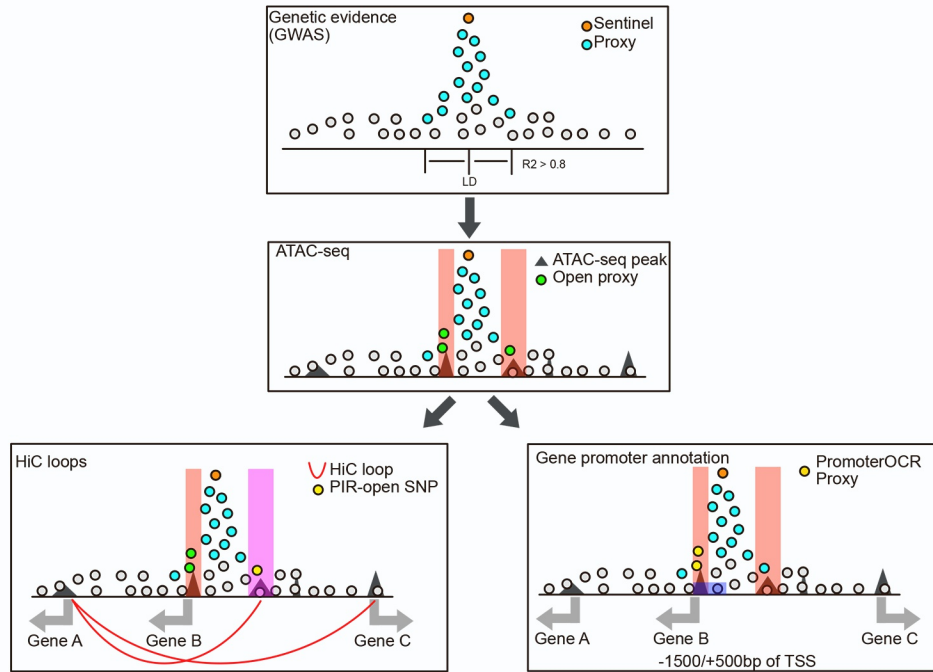

**B**

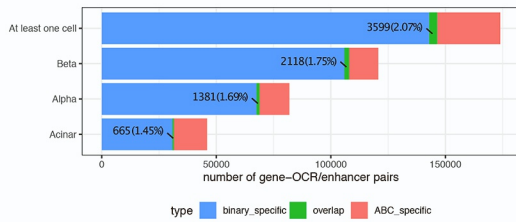

**C**

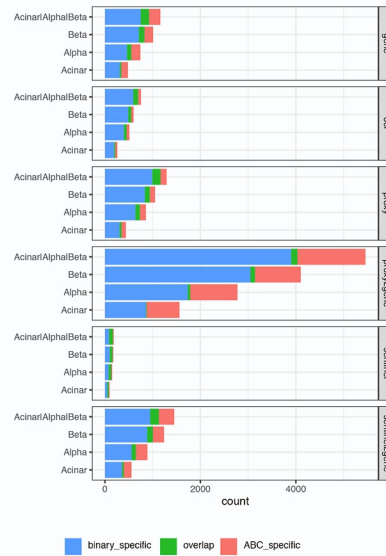

Supplemental Figure 5. Cell Type Specific Variant to Gene Mapping. Related to Figures 5 and 6.

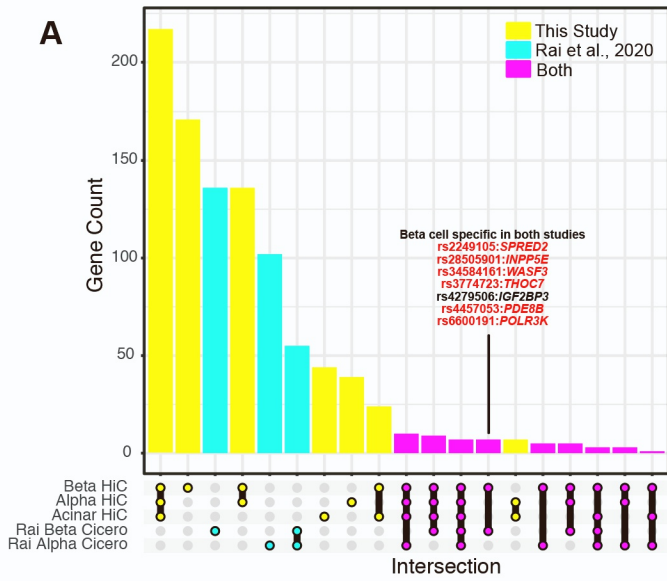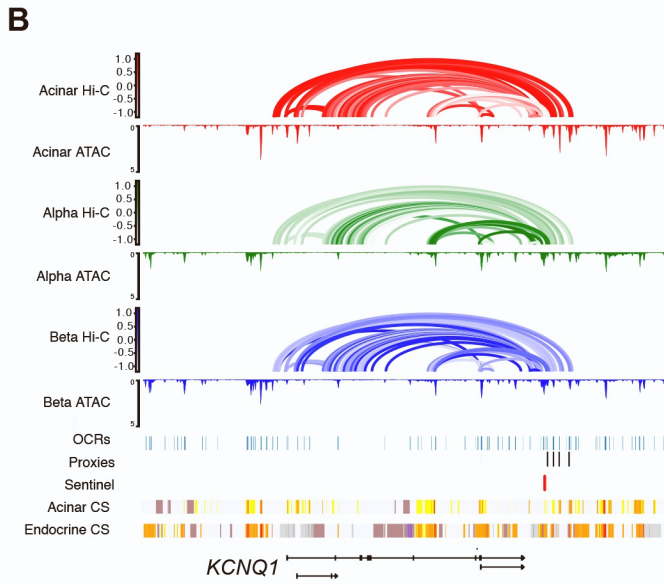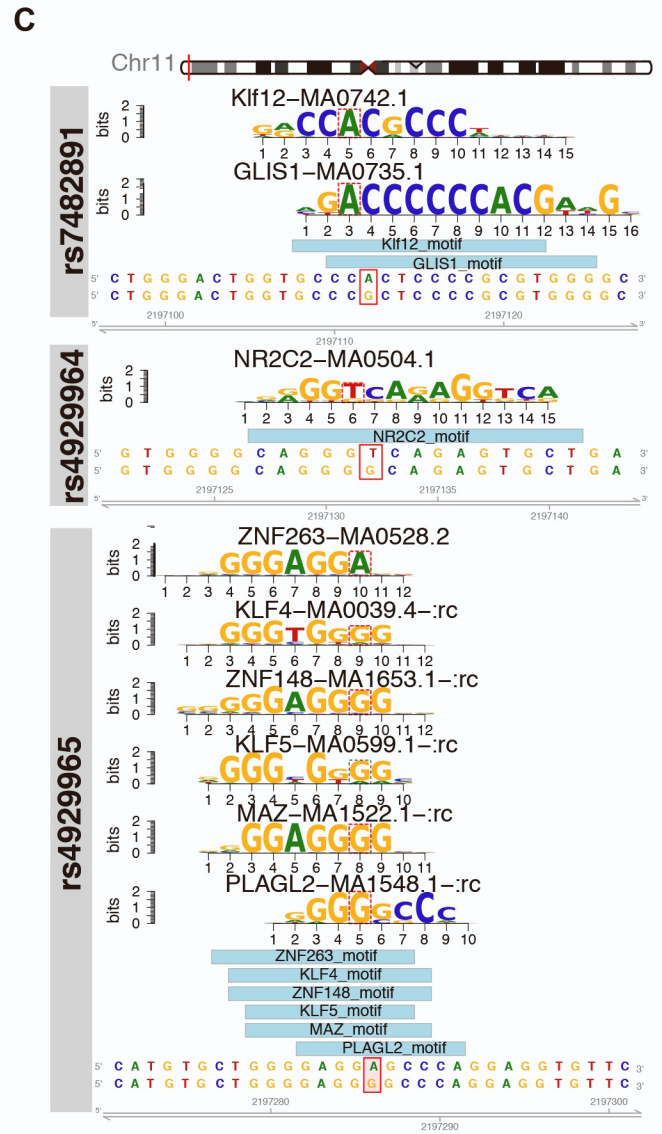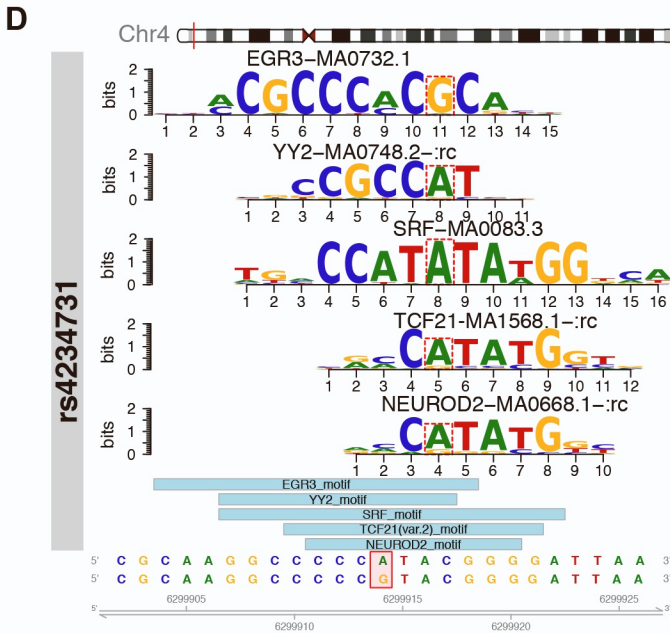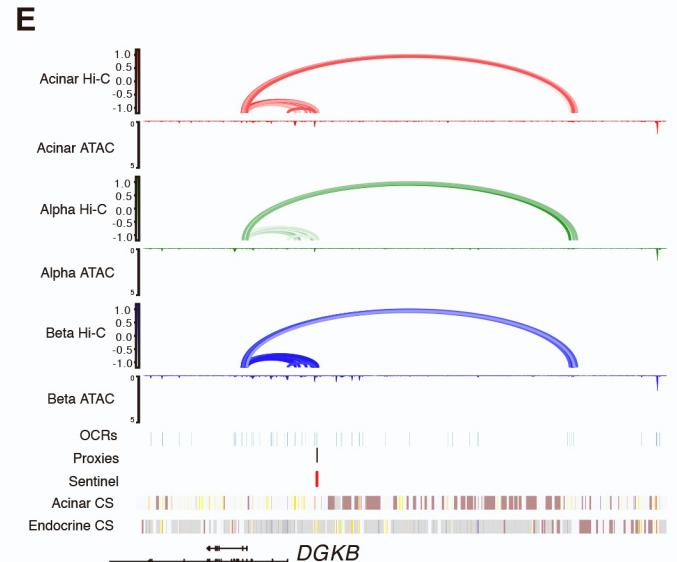



Supplemental Figure 6. Co-Occurrence of variant-to-gene pairs.  
Related to Figures 5 and 6.

A.

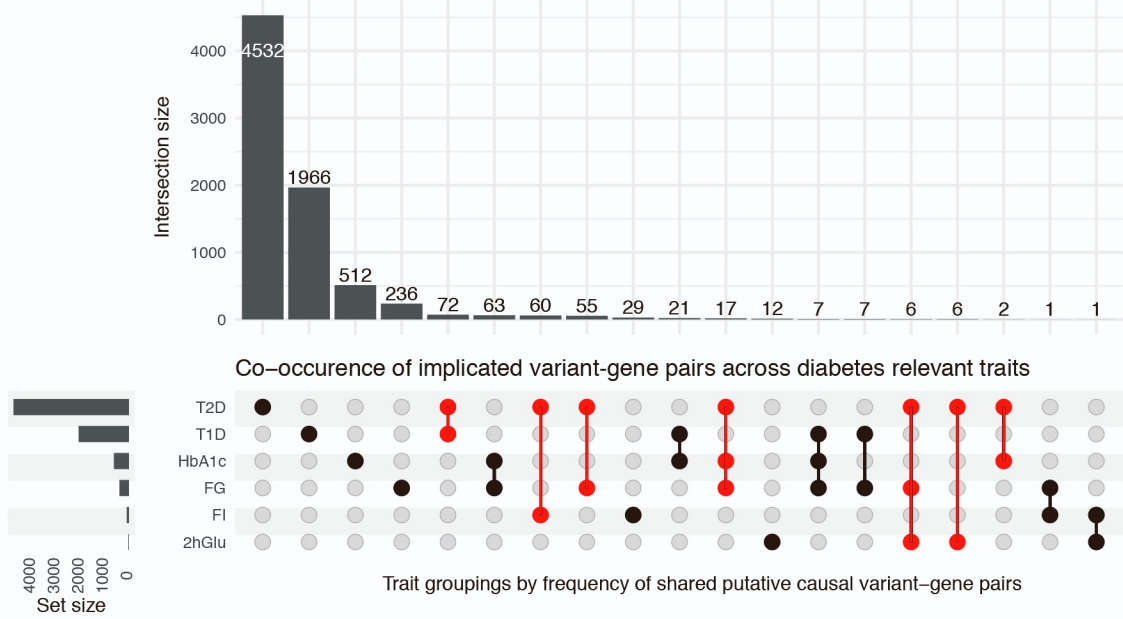

B.

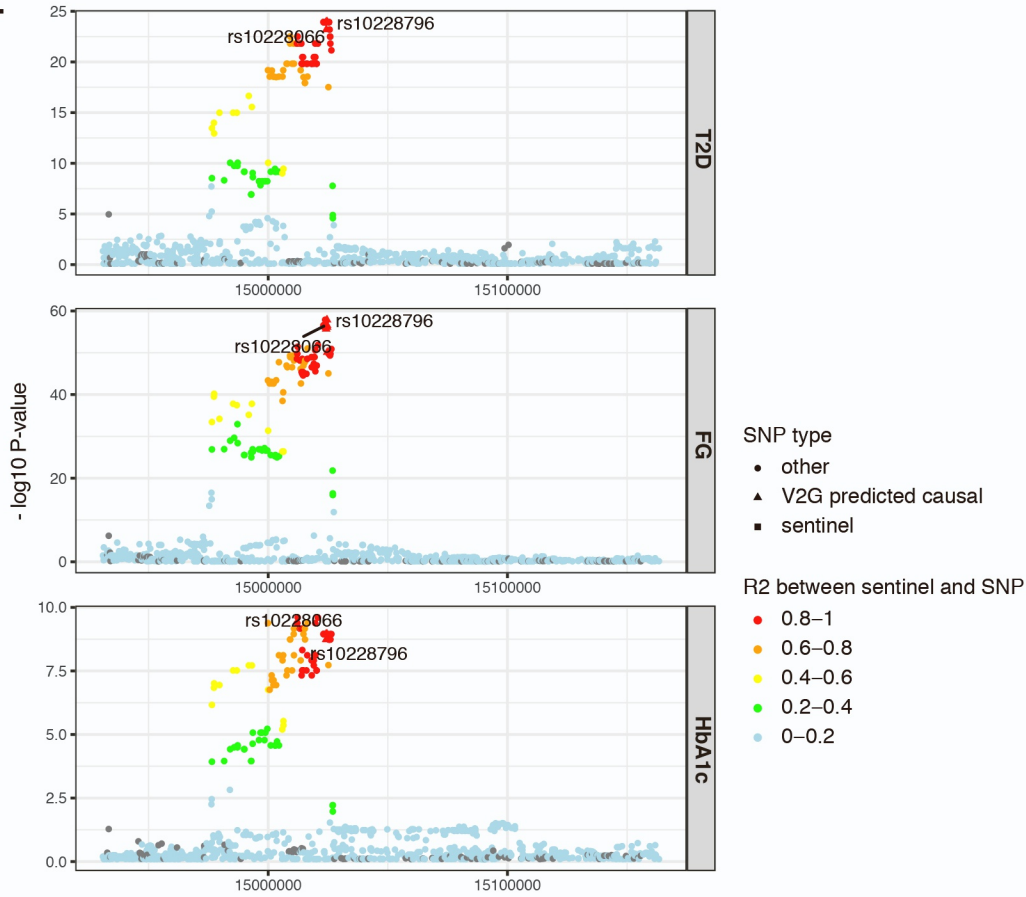

C.

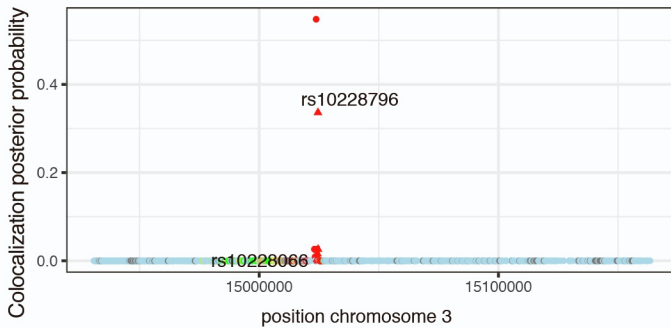

**Table S1. Donor Information. Related to Figure 1.**

Pancreata from non-diabetic organ donors were collected via the HPAP program and processed for the methodologies indicated.

| technique  | donor   | Age | Sex | BMI   | cell number | after filter |      |
|------------|---------|-----|-----|-------|-------------|--------------|------|
| scRNA      | HPAP040 | 35  | M   | 23.98 |             | 2533         | 1519 |
| scRNA      | HPAP045 | 27  | F   | 26.2  |             | 3744         | 1480 |
| scRNA      | HPAP054 | 40  | F   | 30.85 |             | 2823         | 2289 |
| bulkRNAseq | HPAP040 | 35  | M   | 23.98 | N/A         | N/A          |      |
| bulkRNAseq | HPAP045 | 27  | F   | 26.2  | N/A         | N/A          |      |
| bulkRNAseq | HPAP054 | 40  | F   | 30.85 | N/A         | N/A          |      |
| scATAC     | HPAP040 | 35  | M   | 23.98 |             | 4029         | 2653 |
| scATAC     | HPAP045 | 27  | F   | 26.2  |             | 6093         | 3308 |
| scATAC     | HPAP054 | 40  | F   | 30.85 |             | 7408         | 6512 |

| technique | donor   | Age | Sex | BMI   | Cell Types analyzed |
|-----------|---------|-----|-----|-------|---------------------|
| hi-C      | HPAP040 | 35  | M   | 23.98 | acinar, alpha, beta |
| hi-C      | HPAP045 | 27  | F   | 26.2  | alpha, beta         |
| hi-C      | HPAP054 | 40  | F   | 30.85 | acinar              |
| hi-C      | HPAP066 | 58  | F   | 31.07 | acinar, alpha, beta |
| hi-C      | HPAP072 | 19  | M   | 23.1  | acinar              |

Table S2. Summary data for the HiC studies. Related to Figures 1 and 2.

| sample       | path                                                                                    | input #       |
|--------------|-----------------------------------------------------------------------------------------|---------------|
| Acinar_1_HiC | /mnt/isilon/sfgi/suc1/analyses/grant/hiC/hicup/Acinar_1/hicup/Acinar_1_hicupSummary.txt | 2,712,288,871 |
| Acinar_2_HiC | /mnt/isilon/sfgi/suc1/analyses/grant/hiC/hicup/Acinar_2/hicup/Acinar_2_hicupSummary.txt | 3,249,462,125 |
| Alpha_1_HiC  | /mnt/isilon/sfgi/suc1/analyses/grant/hiC/hicup/Alpha_1/hicup/Alpha_1_hicupSummary.txt   | 3,471,287,075 |
| Alpha_2_HiC  | /mnt/isilon/sfgi/suc1/analyses/grant/hiC/hicup/Alpha_2/hicup/Alpha_2_hicupSummary.txt   | 2,269,661,813 |
| Beta_1_HiC   | /mnt/isilon/sfgi/suc1/analyses/grant/hiC/hicup/Beta_1/hicup/Beta_1_hicupSummary.txt     | 4,372,601,515 |
| Beta_2_HiC   | /mnt/isilon/sfgi/suc1/analyses/grant/hiC/hicup/Beta_2/hicup/Beta_2_hicupSummary.txt     | 4,693,960,014 |
| Mean         |                                                                                         |               |

| paired_align # | paired_align | valid_pair #  | valid_pair % | same_circularised % | same_dangling_ends % | same_internal % |
|----------------|--------------|---------------|--------------|---------------------|----------------------|-----------------|
| 1,792,267,263  | 66.08        | 1,759,335,474 | 98.16        | 0.01                | 0.17                 | 0.3             |
| 2,157,447,639  | 66.39        | 2,120,779,052 | 98.3         | 0.01                | 0.14                 | 0.27            |
| 2,243,257,365  | 64.62        | 2,197,350,825 | 97.95        | 0.01                | 0.15                 | 0.32            |
| 1,489,241,307  | 65.62        | 1,461,577,468 | 98.14        | 0.01                | 0.16                 | 0.31            |
| 2,840,479,211  | 64.96        | 2,779,936,755 | 97.87        | 0.06                | 0.2                  | 0.41            |
| 3,060,110,306  | 65.19        | 2,994,589,705 | 97.86        | 0.06                | 0.2                  | 0.42            |

---

| religation % | contiguous_sequence % | wrong_size % | unique_ditag # | unique_ditag % | usage efficiency |
|--------------|-----------------------|--------------|----------------|----------------|------------------|
| 1.35         | 0                     | 0            | 1,504,597,088  | 85.52          | 55.47%           |
| 1.27         | 0                     | 0            | 1,776,039,581  | 83.74          | 54.66%           |
| 1.56         | 0                     | 0            | 1,805,610,570  | 82.17          | 52.02%           |
| 1.37         | 0                     | 0            | 1,232,759,953  | 84.34          | 54.31%           |
| 1.46         | 0                     | 0            | 2,196,100,542  | 79             | 50.22%           |
| 1.46         | 0                     | 0            | 2,316,680,304  | 77.36          | 49.35%           |
|              |                       |              | 1,805,298,006  |                |                  |



Table S3. Summary of Loop Calling from HiC data. Related to Figures 2 and 3.

**file**

---

/mnt/isilon/sfgi/suc1/analyses/grant/hiC/juicer/Acinar\_2reps/hiC\_loops/all/Acinar\_2reps.fithic\_FDR.fdr1e6.res1000.bedpe  
/mnt/isilon/sfgi/suc1/analyses/grant/hiC/juicer/Acinar\_2reps/hiC\_loops/all/Acinar\_2reps.mustache.pt01.res1000.bedpe  
/mnt/isilon/sfgi/suc1/analyses/grant/hiC/juicer/Alpha\_2reps/hiC\_loops/all/Alpha\_2reps.fithic\_FDR.fdr1e6.res1000.bedpe  
/mnt/isilon/sfgi/suc1/analyses/grant/hiC/juicer/Alpha\_2reps/hiC\_loops/all/Alpha\_2reps.mustache.pt01.res1000.bedpe  
/mnt/isilon/sfgi/suc1/analyses/grant/hiC/juicer/Beta\_2reps/hiC\_loops/all/Beta\_2reps.fithic\_FDR.fdr1e6.res1000.bedpe  
/mnt/isilon/sfgi/suc1/analyses/grant/hiC/juicer/Beta\_2reps/hiC\_loops/all/Beta\_2reps.mustache.pt01.res1000.bedpe

---

/mnt/isilon/sfgi/suc1/analyses/grant/hiC/juicer/Acinar\_2reps/hiC\_loops/all/Acinar\_2reps.fithic\_FDR.fdr1e6.res2000.bedpe  
/mnt/isilon/sfgi/suc1/analyses/grant/hiC/juicer/Acinar\_2reps/hiC\_loops/all/Acinar\_2reps.mustache.pt01.res2000.bedpe  
/mnt/isilon/sfgi/suc1/analyses/grant/hiC/juicer/Alpha\_2reps/hiC\_loops/all/Alpha\_2reps.fithic\_FDR.fdr1e6.res2000.bedpe  
/mnt/isilon/sfgi/suc1/analyses/grant/hiC/juicer/Alpha\_2reps/hiC\_loops/all/Alpha\_2reps.mustache.pt01.res2000.bedpe  
/mnt/isilon/sfgi/suc1/analyses/grant/hiC/juicer/Beta\_2reps/hiC\_loops/all/Beta\_2reps.fithic\_FDR.fdr1e6.res2000.bedpe  
/mnt/isilon/sfgi/suc1/analyses/grant/hiC/juicer/Beta\_2reps/hiC\_loops/all/Beta\_2reps.mustache.pt01.res2000.bedpe

---

/mnt/isilon/sfgi/suc1/analyses/grant/hiC/juicer/Acinar\_2reps/hiC\_loops/all/Acinar\_2reps.fithic\_FDR.fdr1e6.res4000.bedpe  
/mnt/isilon/sfgi/suc1/analyses/grant/hiC/juicer/Acinar\_2reps/hiC\_loops/all/Acinar\_2reps.mustache.pt01.res4000.bedpe  
/mnt/isilon/sfgi/suc1/analyses/grant/hiC/juicer/Alpha\_2reps/hiC\_loops/all/Alpha\_2reps.fithic\_FDR.fdr1e6.res4000.bedpe  
/mnt/isilon/sfgi/suc1/analyses/grant/hiC/juicer/Alpha\_2reps/hiC\_loops/all/Alpha\_2reps.mustache.pt01.res4000.bedpe  
/mnt/isilon/sfgi/suc1/analyses/grant/hiC/juicer/Beta\_2reps/hiC\_loops/all/Beta\_2reps.fithic\_FDR.fdr1e6.res4000.bedpe  
/mnt/isilon/sfgi/suc1/analyses/grant/hiC/juicer/Beta\_2reps/hiC\_loops/all/Beta\_2reps.mustache.pt01.res4000.bedpe

| cell         | loop caller | cutoff     | resolution | total_LoopN | merge_caller |
|--------------|-------------|------------|------------|-------------|--------------|
| Acinar_2reps | fithic_FDR  | fdr < 1e-6 | res1000    | 90          |              |
| Acinar_2reps | mustache    | pt < 0.1   | res1000    | 536         | 626          |
| Alpha_2reps  | fithic_FDR  | fdr < 1e-6 | res1000    | 369         |              |
| Alpha_2reps  | mustache    | pt < 0.1   | res1000    | 823         | 1,191        |
| Beta_2reps   | fithic_FDR  | fdr < 1e-6 | res1000    | 2,657       |              |
| Beta_2reps   | mustache    | pt < 0.1   | res1000    | 3,241       | 5,862        |
| Acinar_2reps | fithic_FDR  | fdr < 1e-6 | res2000    | 7,565       |              |
| Acinar_2reps | mustache    | pt < 0.1   | res2000    | 5,206       | 12,542       |
| Alpha_2reps  | fithic_FDR  | fdr < 1e-6 | res2000    | 21,760      |              |
| Alpha_2reps  | mustache    | pt < 0.1   | res2000    | 9,055       | 30,263       |
| Beta_2reps   | fithic_FDR  | fdr < 1e-6 | res2000    | 100,331     |              |
| Beta_2reps   | mustache    | pt < 0.1   | res2000    | 17,300      | 115,935      |
| Acinar_2reps | fithic_FDR  | fdr < 1e-6 | res4000    | 124,634     |              |
| Acinar_2reps | mustache    | pt < 0.1   | res4000    | 10,524      | 132,603      |
| Alpha_2reps  | fithic_FDR  | fdr < 1e-6 | res4000    | 278,357     |              |
| Alpha_2reps  | mustache    | pt < 0.1   | res4000    | 17,656      | 291,377      |
| Beta_2reps   | fithic_FDR  | fdr < 1e-6 | res4000    | 781,486     |              |
| Beta_2reps   | mustache    | pt < 0.1   | res4000    | 25,069      | 797,482      |

consensus loops within resolution   final consensus loops across cells   consensus loops at each resolution

7,499

7,499

142,709

129,492

938,900

860,565

723,574

Table S4: Gene Ontology Analysis. Related to Figures 2 and 3.

| gene set                 | pathway                                                              | fr         | pathway_genes observed | genes                                                                                                                      |
|--------------------------|----------------------------------------------------------------------|------------|------------------------|----------------------------------------------------------------------------------------------------------------------------|
| endocrine-specific genes | enteroendocrine_cell_differentiation                                 | 0.01238328 | 28                     | 8 PAX6,RFX3,GSK3B,CDK6,BMP5,NEUROD1,NKX6-1,INSM1                                                                           |
| endocrine-specific genes | glandular_epithelial_cell_development                                | 0.02841586 | 25                     | 7 PAX6,RFX3,GSK3B,CDK6,BMP5,NKX6-1,INSM1                                                                                   |
| endocrine-specific genes | columnar_cuboidal_epithelial_cell_development                        | 0.02841586 | 58                     | 10 PAX6,RFX3,GSK3B,HIF1A,CDK6,C1GALT1,NKX3-2,BMP5,NKX6-1,INS                                                               |
| endocrine-specific genes | type_b_pancreatic_cell_development                                   | 0.04452176 | 20                     | 6 RFX3,GSK3B,CDK6,BMP5,NKX6-1,INSM1                                                                                        |
| endocrine-specific genes | pancreas_development                                                 | 0.04452176 | 78                     | 11 PAX6,ISL1,RFX3,GSK3B,CDK6,NKX3-2,BMP5,MEIS2,NEUROD1,NKX                                                                 |
| endocrine-specific genes | endocrine_pancreas_development                                       | 0.09101823 | 45                     | 8 PAX6,RFX3,GSK3B,CDK6,BMP5,NEUROD1,NKX6-1,INSM1                                                                           |
| acinar-specific genes    | isoprenoid_metabolic_process                                         | 4.38E-04   | 139                    | 17 DPM1,CYP26B1,AKR1B1,SDC4,APOE,CYP2E1,CYP1B1,CYP2C8,RBP4,                                                                |
| acinar-specific genes    | terpenoid_metabolic_process                                          | 4.38E-04   | 120                    | 16 CYP26B1,AKR1B1,SDC4,APOE,CYP2E1,CYP1B1,CYP2C8,RBP4,RLBP1                                                                |
| acinar-specific genes    | dna_binding_transcription_factor_activity_rna_polymerase_ii_specific | 4.38E-04   | 1094                   | 59 ZBTB32,BARX2,FOXC1,SP100,PAX2,REST,IKZF5,VSX1,ADNP,TCFL5,I<br>NR1I3,VAX1,NKX6-2,HHEX,ERG,ETS2,TAL1,FOXQ1,NKX3-1,HOXD4,i |
| acinar-specific genes    | retinol_metabolic_process                                            | 0.00273548 | 44                     | 9 AKR1B1,CYP1B1,CYP2C8,RBP4,DHRS3,ALDH1A3,CYP27C1,ADH7,AKI                                                                 |
| acinar-specific genes    | monocarboxylic_acid_binding                                          | 0.00273548 | 68                     | 11 CYP26B1,AFM,AFP,APOC1,S100A8,S100A9,ALB,FFAR4,CYP27C1,SE                                                                |
| acinar-specific genes    | sequence_specific_double_stranded_dna_binding                        | 0.00273548 | 889                    | 48 ZBTB32,BARX2,FOXC1,MCM10,PAX2,REST,IKZF5,TCFL5,ETV2,EBF3<br>FOXF2,SMAD6,NR1I3,VAX1,NKX6-2,HHEX,ERG,ETS2,TAL1,FOXQ1,N    |
| acinar-specific genes    | fatty_acid_binding                                                   | 0.0046275  | 36                     | 8 AFM,AFP,APOC1,S100A8,S100A9,ALB,FFAR4,UGT1A8                                                                             |
| acinar-specific genes    | cellular_hormone_metabolic_process                                   | 0.00856178 | 130                    | 14 CYP26B1,AFP,REST,AKR1B1,CYP1B1,CYP2C8,RBP4,DHRS3,UGT2B7                                                                 |
| acinar-specific genes    | endopeptidase_regulator_activity                                     | 0.00856178 | 185                    | 17 BIRC5,SERPINA4,AVP,WFD2C,KNG1,HRG,SLPI,WFD3,ADRM1,NGF                                                                   |
| acinar-specific genes    | double_stranded_dna_binding                                          | 0.00972106 | 981                    | 49 ZBTB32,BARX2,FOXC1,MCM10,PAX2,REST,IKZF5,TCFL5,ETV2,EBF3<br>VAX1,NKX6-2,HHEX,ERG,ETS2,TAL1,FOXQ1,NKX3-1,HOXD4,NHLH1,    |
| acinar-specific genes    | regulatory_region_nucleic_acid_binding                               | 0.00994444 | 960                    | 48 ZBTB32,BARX2,FOXC1,PAX2,REST,IKZF5,VSX1,TCFL5,ETV2,EBF3,N<br>SMAD6,NR1I3,VAX1,NKX6-2,HHEX,ERG,ETS2,TAL1,FOXQ1,NKX3-1,   |
| acinar-specific genes    | dna_binding_transcription_factor_activity                            | 0.00994444 | 1334                   | 61 ZBTB32,BARX2,FOXC1,SP100,PAX2,REST,IKZF5,VSX1,ADNP;<br>MAD6,ZNF287,NR1I3,VAX1,NKX6-2,HHEX,ERG,ETS2,TAL1,FOXQ1,N         |
| acinar-specific genes    | cis_regulatory_region_binding                                        | 0.0110201  | 616                    | 35 PAX2,REST,TCFL5,ETV2,EBF3,NANOG,RFX4,KCNIP3,VAX2,MYB,RBI                                                                |
| acinar-specific genes    | primary_alcohol_metabolic_process                                    | 0.01419379 | 89                     | 11 REST,AKR1B1,CYP1B1,CYP2C8,RBP4,ACSS1,DHRS3,ALDH1A3,CYP27                                                                |
| acinar-specific genes    | peptidase_regulator_activity                                         | 0.0148747  | 222                    | 18 BIRC5,SERPINA4,AVP,WFD2C,KNG1,HRG,SLPI,WFD3,ADRM1,NGF                                                                   |
| acinar-specific genes    | serine_type_endopeptidase_inhibitor_activity                         | 0.01607133 | 92                     | 11 SERPINA4,WFD2C,HRG,SLPI,WFD3,COL6A3,SERPINA10,SERPINA5                                                                  |
| acinar-specific genes    | collagen_containing_extracellular_matrix                             | 0.01607133 | 408                    | 26 LAMA3,FGFR2,COL4A4,ICAM1,ITGA6,COL9A3,GDF10,SMOC2,KNG:                                                                  |
| acinar-specific genes    | mechanosensitive_ion_channel_activity                                | 0.01607133 | 15                     | 5 TMC5,TMC6,PIEZO2,TMC8,TMC7                                                                                               |
| acinar-specific genes    | dna_binding_transcription_repressor_activity                         | 0.01629605 | 249                    | 19 ZBTB32,REST,IKZF5,TCFL5,KCNIP3,VAX2,GZF1,GSC,MYC,VAX1,NKX                                                               |
| acinar-specific genes    | response_to_toxic_substance                                          | 0.0168696  | 539                    | 31 FGFR2,PAX2,EDN1,DNMT3B,ICAM1,AVP,OXT,USP46,APOBEC1,MYI                                                                  |
| acinar-specific genes    | isoprenoid_binding                                                   | 0.0168696  | 36                     | 7 CYP26B1,RBP4,RLBP1,CYP27C1,SERPINA5,ADH7,UGT1A8                                                                          |
| acinar-specific genes    | sequence_specific_dna_binding                                        | 0.02164157 | 1189                   | 54 ZBTB32,BARX2,FOXC1,MCM10,PAX2,REST,IKZF5,VSX1,TCFL5,ETV2<br>FOXF2,SMAD6,NR1I3,VAX1,NKX6-2,HHEX,ERG,ETS2,TAL1,FOXQ1,N    |
| acinar-specific genes    | anatomical_structure_arrangement                                     | 0.02482279 | 17                     | 5 PAX2,HOXB2,KCNA2,DLL1,PLXNA4                                                                                             |
| acinar-specific genes    | enzyme_inhibitor_activity                                            | 0.02495516 | 378                    | 24 BIRC5,SERPINA4,AVP,WFD2C,PHACTR1,KNG1,HRG,SLPI,WFD3,AF                                                                  |
| acinar-specific genes    | regulation_of_peptidase_activity                                     | 0.02682114 | 455                    | 27 PDCD2,PAX2,REST,BIRC5,SERPINA4,AVP,CSNK2A1,WFD2C,KNG1,H                                                                 |
| acinar-specific genes    | acute_inflammatory_response                                          | 0.04717984 | 109                    | 11 ICAM1,PIK3CG,IL1B,SAAP2,S100A8,AHSG,OSMR,SAAP4,IL31RA,CEBPI                                                             |
| acinar-specific genes    | negative_regulation_of_molecular_function                            | 0.04717984 | 1174                   | 52 SP100,PAX2,ARHGAP28,FKBP1A,BIRC5,SERPINA4,ADNP,AVP,CSNK<br>YSF,CYP1B1,AHSG,EPHA1,COMMD7,LYPD1,MGAT5,HHEX,OXA1L,SF       |
| acinar-specific genes    | cranial_nerve_structural_organization                                | 0.04717984 | 11                     | 4 PAX2,HOXB2,KCNA2,PLXNA4                                                                                                  |
| acinar-specific genes    | retinoic_acid_metabolic_process                                      | 0.04757557 | 32                     | 6 CYP26B1,CYP2C8,ALDH1A3,CYP27C1,ADH7,UGT1A8                                                                               |
| acinar-specific genes    | biological_adhesion                                                  | 0.04757557 | 1425                   | 60 LAMA3,LIMS2,ADD2,ICAM3,ICAM1,ITGA6,TM9SF4,ICAM4,ICAM5,P<br>,SMAD6,CYP1B1,CUZD1,ENTPD1,FBLN5,S100A8,ACKR3,ITGA9,EPH      |
| acinar-specific genes    | nuclear_chromosome                                                   | 0.04757557 | 1273                   | 55 ZBTB32,BARX2,FOXC1,MCM10,SP100,PAX2,BIRC5,VSX1,ADNP,TCF<br>SMAD6,NR1I3,VAX1,NKX6-2,HHEX,ERG,ETS2,TAL1,FOXQ1,NKX3-1,     |
| acinar-specific genes    | cornified_envelope                                                   | 0.04757557 | 45                     | 7 TCHH,SPRR1B,SPRR1A,KAZN,HRNR,SPRR2A,SPRR2F                                                                               |
| acinar-specific genes    | dna_binding_transcription_activator_activity                         | 0.04757557 | 427                    | 25 BARX2,FOXC1,ETV2,EBF3,NANOG,RFX4,MYB,RBPJL,HOXD3,MYC,IF                                                                 |

SM1

5-1,INSM1

,RLBP1,DHRS3,PNLIP,ALDH1A3,CYP27C1,ADH7,AKR1B10,UGT1A8  
,DHRS3,PNLIP,ALDH1A3,CYP27C1,ADH7,AKR1B10,UGT1A8  
ETV2,EBF3,NANOG,RFX4,IRX4,KCNIP3,VAX2,MYB,RBPJL,FOXA2,GZF1,HOXD1,HOXD3,GSC,SP110,MYC,IRF4, FOXF2,SMAD6,  
ZNF524,NHLH1,ZNF217,CEBPB,HOXB2,HOXD8,TGIF1,NHLH2,SOX12,FOXS1,FIGLA,SP140L,FOXD2,FOX3,LITAF,ZNF580,HMX1,ZGLP1,EBF2,ASCL5  
R1B10  
RPINA5,UGT1A8  
,NANOG,RFX4,KCNIP3,VAX2,MYB,RBPJL,FOXA2,GZF1,HOXD3,GSC,MYC,IRF4,  
KX3-1,HOXD4,NHLH1,ZNF217,CEBPB,HOXB2,HOXD8,TGIF1,NHLH2,SOX12,FOXS1,FIGLA,LITAF,HMX1,EBF2,ASCL5

,ALDH1A3,CYP27C1,ADH7,AKR1B10,UGT1A8  
,AHSG,COL6A3,SERPINA11,SERPINA5,SERPINA3,SPINK14,SPINK9  
,NANOG,RFX4,KCNIP3,VAX2,MYB,RBPJL,FOXA2,GZF1,HOXD3,GSC,MYC,IRF4,FOXF2,SMAD6,NR1I3,  
ZNF217,CEBPB,HOXB2,HOXD8,TGIF1,NHLH2,SOX12,ZCCHC3,FOXS1,FIGLA,LITAF,HMX1,EBF2,ASCL5  
ANOG,RFX4,KCNIP3,VAX2,MYB,RBPJL,FOXA2,GZF1,HOXD3,GSC,MYC,IRF4,FOXF2,  
HOXD4,NHLH1,ZNF217,CEBPB,HOXB2,HOXD8,TGIF1,NHLH2,SOX12,FOXS1,FIGLA,LITAF,HMX1,EBF2,ASCL5  
TCFL5,ETV2,EBF3,NANOG,RFX4,IRX4,KCNIP3,VAX2,MYB,RBPJL,FOXA2,GZF1,HOXD1,HOXD3,GSC,SP110,MYC,IRF4,FOXF2,S5  
KX3-1,HOXD4,ZNF524,NHLH1,ZNF217,CEBPB,HOXB2,HOXD8,TGIF1,NHLH2,SOX12,FOXS1,FIGLA,SP140L,FOXD2,FOX3,LITAF,ZNF580,HMX1,ZGLP1,EBF2,ASCL  
PJL,FOXA2,GZF1,HOXD3,GSC,MYC,IRF4,SMAD6,VAX1,NKX6-2,HHEX,ERG,ETS2,TAL1,FOXQ1,NKX3-1,ZNF217,CEBPB,HOXB2,TGIF1,NHLH2,FOXS1,FIGLA,LITAF,EBF2  
7C1,ADH7,AKR1B10  
,AHSG,COL6A3,NKX3-1,SERPINA11,SERPINA5,SERPINA3,SPINK14,SPINK9  
,SERPINA3,SPINK14,SPINK9  
1,HRG,SLPI,MATN4,APOE,ADAMDEC1,FBLN5,S100A8,AHSG,LAD1,S100A9,COL6A3,HTRA1,THBS2,SERPINA5,SERPINA3,COL13A1,HRNR

6-2,HHEX,ETS2,FOXQ1,ZNF217,CEBPB,TGIF1,FOXS1,HMX1  
B,MPST,APOE,CYP2E1,TLR2,CYP1B1,RBP4,FBLN5,S100A8,RGS10,LYPD1,S100A9,ALB,GPX8,BCL2L1,ADH7,ADA,GSTK1,AKR1B10,ZNF580,INMT,SRXN1

,EBF3,NANOG,RFX4,IRX4,KCNIP3,VAX2,MYB,RBPJL,FOXA2,GZF1,HOXD1,HOXD3,GSC,MYC,IRF4,  
KX3-1,HOXD4,NHLH1,ZNF217,CEBPB,HOXB2,HOXD8,TGIF1,NHLH2,SOX12,FOXS1,FIGLA,FOXD2,FOX3,LITAF,HMX1,ZGLP1,EBF2,ASCL5

OC1,NGF,AHSG,MGAT5,SH3RF2,COL6A3,SOCS3,SERPINA11,SERPINA5,SERPINA3,SPINK14,SPINK9,FGFR1OP,UGT1A8,PINX1  
RG,SLPI,WFDC3,ADRM1,NGF,MYC,S100A8,AHSG,S100A9,COL6A3,NKX3-1,MALT1,CASC2,SERPINA11,SERPINA5,SERPINA3,SPINK14,SPINK9  
B,SERPINA3  
2A1,WFDC2,MAPK8,PHACTR1,DUSP22,KNG1,HRG,TNNT2,SLPI,WFDC3,IL1B,FOXA2,SH3BP4,APOE,APOC1,NGF,D  
3RF2,COL6A3,NKX3-1,TMC8,FOXS1,KCNE1,SOCS3,SERPINA11,SERPINA5,SERPINA3,ADH7,PTPN1,SPINK14,SPINK9,FGFR1OP,UGT1A8,DBNDD2,PINX1,MTRNR2L6

IK3CG,DOCK8,CDH23,MAP3K8,SMOC2,DUSP22,KNG1,HRG,CD58,MYB,LY9,SDCA,IL1B,FOXA2,HOXD3,ADAMDEC1,VTGN1,DYSF,GPNMB,LRR32L13A1,DLL1,PLXNA4,CLDN23  
A1,DOCK5,HABP2,ADAM12,ROBO4,MPZ,ZYX,PDPN,INHBB,S100A9,COL6A3,DACT2,MALT1,CEBPB,SLITRK1,THBS2,PEAR1,AJAP1,ADA,CO  
L5,CSNK2A1,EBF3,NANOG,RFX4,IRX4,VAX2,TCP1,LRIF1,RBPJL,FOXA2,HOXD1,HOXD3,GSC,MYC,IRF4,FOXF2,  
HOXD4,NHLH1,CEBPB,HOXB2,HOXD8,TGIF1,NHLH2,SOX12,FOXS1,FIGLA,SS18L1,FOXD2,FOX3,HUS1B,ZNF580,HMX1,EBF2,ASCL5,PINX1

RF4,FOXF2,NR1I3,ERG,HOXD4,NHLH1,CEBPB,HOXB2,HOXD8,NHLH2,SOX12,FIGLA,FOXD2,LITAF,EBF2



Table S8: Enrichment of diabetes-associated genetic risk variants by pancreatic cell type. Related to Figure 5.

| Category                                         | Prop._SNPs | Prop._h2   | Prop._h2_stc | Enrichment | Enrichment | Enrichment_fdr |            |
|--------------------------------------------------|------------|------------|--------------|------------|------------|----------------|------------|
| 2hGlu.geneAnnotatedOCR_Acinar                    | 0.00855617 | 0.16764967 | 0.07526909   | 19.5940009 | 8.79705077 | 0.03046446     | 0.63975376 |
| 2hGlu.geneAnnotatedOCR_Alpha                     | 0.01260285 | 0.20947575 | 0.09461634   | 16.6213057 | 7.50753791 | 0.0312846      | 0.63975376 |
| 2hGlu.geneAnnotatedOCR_Beta                      | 0.01366653 | 0.28189533 | 0.12457444   | 20.6267011 | 9.11529739 | 0.02708337     | 0.59583407 |
| atrial_fibrillation.geneAnnotatedOCR_Acinar      | 0.00855617 | -0.0070516 | 0.0450305    | -0.8241541 | 5.26292515 | 0.72898969     | 1          |
| atrial_fibrillation.geneAnnotatedOCR_Alpha       | 0.01260285 | 0.09509896 | 0.05563086   | 7.54583268 | 4.41415045 | 0.14614653     | 1          |
| atrial_fibrillation.geneAnnotatedOCR_Beta        | 0.01366653 | 0.05474646 | 0.05133715   | 4.00588021 | 3.75641586 | 0.42721354     | 1          |
| chronotype.geneAnnotatedOCR_Acinar               | 0.00855617 | 0.07281258 | 0.01755409   | 8.50994717 | 2.05162882 | 2.55E-04       | 0.00763717 |
| chronotype.geneAnnotatedOCR_Alpha                | 0.01260285 | 0.10868292 | 0.02066125   | 8.62368097 | 1.63941184 | 3.91E-06       | 1.33E-04   |
| chronotype.geneAnnotatedOCR_Beta                 | 0.01366653 | 0.13621118 | 0.02342549   | 9.96677503 | 1.71407767 | 2.70E-07       | 9.71E-06   |
| FG.geneAnnotatedOCR_Acinar                       | 0.00855617 | 0.1483003  | 0.04462611   | 17.3325496 | 5.21566265 | 0.00300735     | 0.08119844 |
| FG.geneAnnotatedOCR_Alpha                        | 0.01260285 | 0.29933307 | 0.05645784   | 23.751229  | 4.47976917 | 1.05E-06       | 3.66E-05   |
| FG.geneAnnotatedOCR_Beta                         | 0.01366653 | 0.47871629 | 0.10560444   | 35.0283845 | 7.72723414 | 2.27E-05       | 7.50E-04   |
| FI.geneAnnotatedOCR_Acinar                       | 0.00855617 | 0.0693239  | 0.03755978   | 8.102209   | 4.3897868  | 0.09839489     | 1          |
| FI.geneAnnotatedOCR_Alpha                        | 0.01260285 | 0.06595173 | 0.03798391   | 5.23308231 | 3.01391524 | 0.15335084     | 1          |
| FI.geneAnnotatedOCR_Beta                         | 0.01366653 | 0.03286877 | 0.03664848   | 2.40505679 | 2.68162407 | 0.59594923     | 1          |
| HbA1c.geneAnnotatedOCR_Acinar                    | 0.00855617 | 0.08464628 | 0.03668295   | 9.8930062  | 4.28730794 | 0.03437695     | 0.63975376 |
| HbA1c.geneAnnotatedOCR_Alpha                     | 0.01260285 | 0.10465562 | 0.04659651   | 8.30412647 | 3.6973009  | 0.04231339     | 0.6770143  |
| HbA1c.geneAnnotatedOCR_Beta                      | 0.01366653 | 0.18110832 | 0.05440388   | 13.251966  | 3.98081287 | 0.00154961     | 0.04493869 |
| HOMA-B.geneAnnotatedOCR_Acinar                   | 0.00855617 | 0.16305973 | 0.10297413   | 19.0575539 | 12.0350677 | 0.13426201     | 1          |
| HOMA-B.geneAnnotatedOCR_Alpha                    | 0.01260285 | 0.19825909 | 0.11325182   | 15.7312958 | 8.98621047 | 0.10037413     | 1          |
| HOMA-B.geneAnnotatedOCR_Beta                     | 0.01366653 | 0.36140907 | 0.14635052   | 26.4448399 | 10.7086856 | 0.01316583     | 0.30281415 |
| HOMA-IR.geneAnnotatedOCR_Acinar                  | 0.00855617 | 0.0581504  | 0.10325324   | 6.79630905 | 12.0676896 | 0.63298391     | 1          |
| HOMA-IR.geneAnnotatedOCR_Alpha                   | 0.01260285 | 0.0075903  | 0.11331771   | 0.60226895 | 8.99143833 | 0.96456976     | 1          |
| HOMA-IR.geneAnnotatedOCR_Beta                    | 0.01366653 | 0.09594914 | 0.11296438   | 7.02074139 | 8.26577164 | 0.46151987     | 1          |
| pancCancer.Rashkin_NatComm2020.geneAnnotatedO    | 0.00855617 | 46.0254791 | 8688.73098   | 5379.21301 | 1015492.63 | 0.00160062     | 0.04493869 |
| pancCancer.Rashkin_NatComm2020.geneAnnotatedO    | 0.01260285 | 10.1579979 | 408.855324   | 806.008272 | 32441.5084 | 0.03399007     | 0.63975376 |
| pancCancer.Rashkin_NatComm2020.geneAnnotatedO    | 0.01366653 | 15.2616232 | 4391.98782   | 1116.71571 | 321368.293 | 0.03227247     | 0.63975376 |
| sleepDuration_selfReported.geneAnnotatedOCR_Acin | 0.00855617 | 0.04147672 | 0.01805838   | 4.84757856 | 2.11056685 | 0.0680744      | 1          |
| sleepDuration_selfReported.geneAnnotatedOCR_Alph | 0.01260285 | 0.07214588 | 0.02144071   | 5.72457076 | 1.70125906 | 0.00571416     | 0.14285407 |
| sleepDuration_selfReported.geneAnnotatedOCR_Betz | 0.01366653 | 0.10383472 | 0.02219802   | 7.59774116 | 1.62426238 | 6.89E-05       | 0.00220545 |
| T1D.Chiou_Nat2021.geneAnnotatedOCR_Acinar        | 0.00855617 | 0.09903346 | 0.11180016   | 11.5745037 | 13.0666078 | 0.39971358     | 1          |
| T1D.Chiou_Nat2021.geneAnnotatedOCR_Alpha         | 0.01260285 | 0.15989746 | 0.08853903   | 12.6874095 | 7.02532087 | 0.09145148     | 1          |
| T1D.Chiou_Nat2021.geneAnnotatedOCR_Beta          | 0.01366653 | 0.19006722 | 0.11303459   | 13.9075018 | 8.27090954 | 0.11587556     | 1          |
| T2D.Mahajan_NatGenet2018b.geneAnnotatedOCR_Ai    | 0.00855617 | 0.12327666 | 0.04235348   | 14.4079201 | 4.95004905 | 0.00754301     | 0.18103227 |
| T2D.Mahajan_NatGenet2018b.geneAnnotatedOCR_Al    | 0.01260285 | 0.17354021 | 0.05379666   | 13.7699228 | 4.26861178 | 0.00329411     | 0.08564687 |
| T2D.Mahajan_NatGenet2018b.geneAnnotatedOCR_Bi    | 0.01366653 | 0.2331373  | 0.05792345   | 17.0590036 | 4.23834547 | 2.39E-04       | 0.00740902 |

Table S14: Genetic variants with likely pleiotropic effects between T2D and glycemic traits. Related to Figures 5 and 6.

| input_sentin | coloc_traits   | multi-trait cc | multi-trait cc | top variant e | posterior pro | v2g causal v | v2g causal v | posterior pro | v2g gene_id             | v2g gene_name | T2D |
|--------------|----------------|----------------|----------------|---------------|---------------|--------------|--------------|---------------|-------------------------|---------------|-----|
| rs11257655   | T2D, HbA1c     | 0.9998         | 1              | rs11257655    | 1             | rs11257655   | chr10:123071 | 0.99999999    | ENSG000001CCDC3         |               |     |
|              |                |                |                |               |               |              |              |               | ENSG000001OPTN          |               |     |
| rs11202627   | T2D, FI        | 0.4837         | 0.9288         | rs10788577    | 0.1239        | rs10490920   | chr10:896851 | 0.02765334    | ENSG000001PTEN          |               |     |
| rs7115753    | T2D, FG        | 0.9809         | 0.9999         | rs10838524    | 0.9988        | rs7945565    | chr11:458781 | 7.48E-05      | ENSG000001CRY2          |               |     |
|              |                |                |                |               |               | rs7945689    | chr11:458791 | 3.06E-05      | ENSG000001CRY2          |               |     |
|              |                |                |                |               |               | rs1401419    | chr11:458791 | 1.29E-05      | ENSG000001CRY2          |               |     |
| rs77464186   | T2D, FG        | 0.9938         | 1              | rs11603349    | 0.8479        | rs11603334   | chr11:724321 | 6.10E-09      | ENSG000001ARAP1         |               |     |
|              |                |                |                |               |               |              |              |               | ENSG000001ATG16L2       |               |     |
|              |                |                |                |               |               |              |              |               | ENSG000002RP11-800A3.3  |               |     |
|              |                |                |                |               |               |              |              |               | ENSG000002RP11-800A3.4  |               |     |
|              |                |                |                |               |               |              |              |               | ENSG000002STARD10       |               |     |
|              |                |                |                |               |               | rs1552224    | chr11:724331 | 6.10E-09      | ENSG000001ARAP1         |               |     |
|              |                |                |                |               |               |              |              |               | ENSG000001ATG16L2       |               |     |
|              |                |                |                |               |               |              |              |               | ENSG000002RP11-800A3.3  |               |     |
|              |                |                |                |               |               |              |              |               | ENSG000002RP11-800A3.4  |               |     |
|              |                |                |                |               |               |              |              |               | ENSG000002STARD10       |               |     |
|              |                |                |                |               |               | rs7109575    | chr11:724631 | 1.03E-07      | ENSG000001ARAP1         |               |     |
|              |                |                |                |               |               |              |              |               | ENSG000001ATG16L2       |               |     |
|              |                |                |                |               |               |              |              |               | ENSG000002STARD10       |               |     |
|              |                |                |                |               |               | rs140130268  | chr11:724701 | NA            | ENSG000001ARAP1         |               |     |
|              |                |                |                |               |               |              |              |               | ENSG000001ATG16L2       |               |     |
|              |                |                |                |               |               |              |              |               | ENSG000002STARD10       |               |     |
| rs1005752    | T2D, FG        | 0.9571         | 1              | rs62007299    | 0.3049        | rs62007299   | chr15:777111 | 0.30491706    | ENSG000001HMG20A        |               |     |
|              |                |                |                |               |               | rs34591043   | chr15:777131 | 0.10483043    | ENSG000001HMG20A        |               |     |
|              |                |                |                |               |               |              |              |               | ENSG000001PEAK1         |               |     |
| rs72802342   | T2D, T1D       | 0.9739         | 1              | rs55993634    | 0.5528        | rs72802352   | chr16:752401 | 0.00892121    | ENSG000001BCAR1         |               |     |
|              |                |                |                |               |               |              |              |               | ENSG000001CFDP1         |               |     |
|              |                |                |                |               |               |              |              |               | ENSG000001CTRB1         |               |     |
|              |                |                |                |               |               |              |              |               | ENSG000001CTRB2         |               |     |
|              |                |                |                |               |               |              |              |               | ENSG000002RP11-252K23.2 |               |     |
|              |                |                |                |               |               | rs147630228  | chr16:752511 | NA            | ENSG000001CTRB1         |               |     |
|              |                |                |                |               |               |              |              |               | ENSG000002RP11-252K23.2 |               |     |
| rs6518681    | T2D, FG        | 0.7031         | 0.9894         | rs7286205     | 0.0582        | rs55645000   | chr22:303901 | 0.00965975    | ENSG000001ASCC2         |               |     |
|              |                |                |                |               |               | rs73883354   | chr22:304011 | 2.65E-04      | ENSG000001ASCC2         |               |     |
|              |                |                |                |               |               |              |              |               | ENSG000001CABP7         |               |     |
|              |                |                |                |               |               |              |              |               | ENSG000002RP1-76B20.11  |               |     |
|              |                |                |                |               |               |              |              |               | ENSG000002RP1-76B20.12  |               |     |
|              |                |                |                |               |               |              |              |               | ENSG000001UQCR10        |               |     |
|              |                |                |                |               |               |              |              |               | ENSG000001ZMAT5         |               |     |
|              |                |                |                |               |               | rs6519802    | chr22:304761 | 0.0063823     | ENSG000002CTA-85E5.10   |               |     |
|              |                |                |                |               |               |              |              |               | ENSG000001HORMAD2       |               |     |
|              |                |                |                |               |               |              |              |               | ENSG000001NEFH          |               |     |
|              |                |                |                |               |               |              |              |               | ENSG000001NF2           |               |     |
|              |                |                |                |               |               |              |              |               | ENSG000001THOCS         |               |     |
| rs11709077   | T2D, FI        | 0.6065         | 1              | rs11709077    | 0.865         | rs17036160   | chr3:1232971 | 0.13163971    | ENSG000001PPARG         |               |     |
|              |                |                |                |               |               | rs7649970    | chr3:1239221 | 1.70E-06      | ENSG000001PPARG         |               |     |
| rs9873618    | T2D, FG, HbA1c | 0.9421         | 1              | rs1604038     | 0.4285        | rs5396       | chr3:1707441 | 1.10E-11      | ENSG000001SLC2A2        |               |     |
| rs1903002    | T2D, FI        | 0.8956         | 0.9993         | rs13133548    | 0.2781        | rs10012528   | chr4:8972491 | 3.91E-04      | ENSG000001FAM13A        |               |     |
|              |                |                |                |               |               | rs10012624   | chr4:8972501 | 0.00127825    | ENSG000001FAM13A        |               |     |
| rs4457053    | T2D, FG        | 0.9849         | 1              | rs4457054     | 0.2561        | rs7732130    | chr5:7643501 | 0.08210518    | ENSG000001PDE8B         |               |     |
|              |                |                |                |               |               |              |              |               | ENSG000001WDR41         |               |     |
|              |                |                |                |               |               |              |              |               | ENSG000002ZBED3-AS1     |               |     |
| rs10228066   | T2D, HbA1c,    | 0.8186         | 1              | rs10487796    | 0.5478        | rs7798124    | chr7:1505561 | 2.03E-19      | ENSG000001DGKB          |               |     |
|              |                |                |                |               |               | rs7798360    | chr7:1505591 | 3.05E-15      | ENSG000001DGKB          |               |     |
|              |                |                |                |               |               | rs10244051   | chr7:1506381 | 0.00351715    | ENSG000001DGKB          |               |     |
|              |                |                |                |               |               | rs10950550   | chr7:1506391 | 0.00297837    | ENSG000001DGKB          |               |     |
|              |                |                |                |               |               | rs10228456   | chr7:1506391 | 0.01607244    | ENSG000001DGKB          |               |     |
|              |                |                |                |               |               | rs10228561   | chr7:1506391 | NA            | ENSG000001DGKB          |               |     |
|              |                |                |                |               |               | rs10228796   | chr7:1506411 | 0.33622332    | ENSG000001DGKB          |               |     |
|              |                |                |                |               |               | rs10258074   | chr7:1506421 | 0.02618626    | ENSG000001DGKB          |               |     |
|              |                |                |                |               |               | rs2191348    | chr7:1506421 | 0.00587885    | ENSG000001DGKB          |               |     |
|              |                |                |                |               |               | rs2191349    | chr7:1506431 | 6.10E-09      | ENSG000001DGKB          |               |     |
| rs878521     | T2D, 2hGlu     | 0.9989         | 1              | rs878521      | 0.9885        | rs878521     | chr7:4425561 | 0.9885278     | ENSG000001CAMK2B        |               |     |
|              |                |                |                |               |               |              |              |               | ENSG000001DBNL          |               |     |
|              |                |                |                |               |               |              |              |               | ENSG000001DDX56         |               |     |
|              |                |                |                |               |               |              |              |               | ENSG000001NUDCD3        |               |     |
|              |                |                |                |               |               |              |              |               | ENSG000001POLD2         |               |     |
|              |                |                |                |               |               |              |              |               | ENSG000001POLM          |               |     |
| rs10097617   | T2D, FG        | 0.9458         | 0.9996         | rs896854      | 0.7294        | rs13262110   | chr8:9592681 | 5.25E-05      | ENSG000001NDUFAF6       |               |     |
|              |                |                |                |               |               | rs896853     | chr8:9596081 | 0.02872132    | ENSG000001NDUFAF6       |               |     |
|              |                |                |                |               |               |              |              |               | ENSG000002RP11-347C18.3 |               |     |
|              |                |                |                |               |               | rs896852     | chr8:9596081 | 0.01476664    | ENSG000001NDUFAF6       |               |     |
|              |                |                |                |               |               |              |              |               | ENSG000002RP11-347C18.3 |               |     |
|              |                |                |                |               |               | rs2879813    | chr8:9596091 | 0.07148914    | ENSG000001NDUFAF6       |               |     |
|              |                |                |                |               |               |              |              |               | ENSG000002RP11-347C18.3 |               |     |
|              |                |                |                |               |               | rs10097617   | chr8:9596161 | 0.00889038    | ENSG000001NDUFAF6       |               |     |
|              |                |                |                |               |               |              |              |               | ENSG000002RP11-347C18.3 |               |     |
|              |                |                |                |               |               |              |              |               | ENSG000001TP53INP1      |               |     |
|              |                |                |                |               |               | rs10108430   | chr8:9596171 | 2.09E-05      | ENSG000001NDUFAF6       |               |     |
|              |                |                |                |               |               |              |              |               | ENSG000002RP11-347C18.3 |               |     |

|            |           |        |        |            |           |              |              |            |                         |
|------------|-----------|--------|--------|------------|-----------|--------------|--------------|------------|-------------------------|
|            |           |        |        |            |           |              |              |            | ENSG000001TP53INP1      |
|            |           |        |        |            | rs7003387 | chr8:959619: | 0.020074     |            | ENSG000001NDUFAF6       |
|            |           |        |        |            |           |              |              |            | ENSG000002RP11-347C18.3 |
|            |           |        |        |            |           |              |              |            | ENSG000001TP53INP1      |
| rs13024606 | T2D, FI   | 0.9692 | 1      | rs13389219 | 0.8018    | rs7607980    | chr2:165551: | 1.71E-07   | ENSG000000COBLL1        |
| rs1903002  | T2D, FI   | 0.8956 | 0.9993 | rs13133548 | 0.2781    | rs13133548   | chr4:897401: | 0.27807708 | ENSG000001FAM13A        |
|            |           |        |        |            |           |              |              |            | ENSG000002RP11-84C13.1  |
|            |           |        |        |            |           |              |              |            | ENSG000001TIGD2         |
| rs9505097  | FG, HbA1c | 0.997  | 1      | rs3778321  | 0.9996    | rs76823979   | chr6:723666: | 3.07E-06   | ENSG000002RP1-80N2.2    |
|            |           |        |        |            |           |              |              |            | ENSG000002RP1-80N2.3    |
|            |           |        |        |            |           |              |              |            | ENSG000002RP3-470L22.1  |
|            |           |        |        |            |           |              |              |            | ENSG000001RREB1         |
|            |           |        |        |            |           |              |              |            | ENSG000002RP1-80N2.2    |
|            |           |        |        |            |           |              |              |            | ENSG000002RP1-80N2.3    |
|            |           |        |        |            |           |              |              |            | ENSG000002RP3-470L22.1  |
|            |           |        |        |            |           |              |              |            | ENSG000001RREB1         |
|            |           |        |        |            |           |              |              |            | ENSG000001RREB1         |
